# Supplementary material for: A new family of thiolate-bridged bimetallic complexes featuring a benzimidazole moiety: synthesis, structure and redox reactivity
Source: Royal Society of Chemistry journal article supplement (doi:10.1039/d4dt02484b), 2024-01-01
Supplement: d4dt02484b1.pdf [file d4dt02484b1.pdf]

## Electronic Supplementary Information (ESI)

### **A new family of thiolate-bridged bimetallic complexes featuring benzimidazole moiety: synthesis, structure and redox reactivity**

Kai Di,<sup>a</sup> Dawei Yang,<sup>\*a</sup> Linan Su,<sup>a</sup> Ronghuan Du,<sup>a</sup> Shengbin Dong,<sup>b</sup> Baomin Wang<sup>a</sup> and Jingping Qu<sup>\*a,b</sup>

*<sup>a</sup>State Key Laboratory of Fine Chemicals, Frontier Science Center for Smart Materials, Dalian University of Technology, Dalian 116024, P. R. China.*

*<sup>b</sup>State Key Laboratory of Bioreactor Engineering, Collaborative Innovation Centre for Biomanufacturing, Frontiers Science Center for Materiobiology and Dynamic Chemistry, East China University of Science and Technology, Shanghai 200237, P. R. China.*

E-mail: qujp@dlut.edu.cn; yangdw@dlut.edu.cn

## Table of Contents

|                                                       |    |
|-------------------------------------------------------|----|
| I. General Materials and Methods.....                 | 3  |
| II. Experimental Procedures and Analytical Data ..... | 5  |
| III. X-ray Crystallographic Data.....                 | 8  |
| IV. NMR Spectra.....                                  | 16 |
| V. IR Spectra .....                                   | 18 |
| VI. ESI High-resolution Mass Spectra .....            | 21 |
| VII. Cyclic Voltammograms .....                       | 25 |
| VIII. <i>In situ</i> <sup>1</sup> H NMR Spectra ..... | 27 |
| IX. UV/vis Spectra.....                               | 28 |
| X. Computational Details .....                        | 31 |
| XI. References.....                                   | 33 |

## I. General Materials and Methods

### General Procedures

All manipulations were performed under an argon or nitrogen atmosphere by standard Schlenk techniques or in a Braun (Germany) or Mikrouna (China) glove box maintained at or below 1 ppm of O<sub>2</sub> and H<sub>2</sub>O unless otherwise specified. All solvents were dried and distilled over an appropriate drying agent under an argon or nitrogen atmosphere. Benzimidazolymethyl disulfide (bzmds), benzimidazol-2-ylmethanethiol (bzmt),<sup>1</sup> [Cp\*Fe(MeCN)<sub>3</sub>][PF<sub>6</sub>] (Cp\* =  $\eta^5$ -C<sub>5</sub>Me<sub>5</sub>),<sup>2</sup> [Cp\*CoI<sub>2</sub>(CO)],<sup>3</sup> [Cp\*Ru(MeCN)<sub>3</sub>][PF<sub>6</sub>],<sup>4</sup> graphite potassium (KC<sub>8</sub>),<sup>5</sup> and ferricenium hexafluorophosphate (FcPF<sub>6</sub>)<sup>6</sup> were prepared according to literature procedures. Reagents NaOAc, KPF<sub>6</sub>, and Na<sub>2</sub>SO<sub>4</sub> are commercially available and used as received without further purification.

### Spectroscopic Measurements

<sup>1</sup>H NMR spectra is recorded on a Bruker 400 Ultra Shield spectrometer. The chemical shifts ( $\delta$ ) are given in parts per million relative to CD<sub>3</sub>CN (1.94 ppm for <sup>1</sup>H), CD<sub>2</sub>Cl<sub>2</sub> (5.32 ppm for <sup>1</sup>H). Infrared spectra were recorded on a NEXVSTM FT-IR spectrometer. Electrospray ionization high-resolution mass spectra were recorded on a Q-ToF Micro. Elemental analyses were performed on a Vario EL analyzer. Electrochemical measurements were recorded using a BAS-100W electrochemical potentiostat at a scan rate of 100 mV/s. Electrochemical experiments were carried out in a three-electrode cell under argon at room temperature. The working electrode was a glassy carbon disk (diameter 3 mm), the reference electrode was a nonaqueous Ag/AgNO<sub>3</sub> electrode, the auxiliary electrode was a platinum wire, and the supporting electrolyte was 0.1 M <sup>n</sup>Bu<sub>4</sub>NPF<sub>6</sub> in MeCN. All potentials reported herein are quoted relative to the Fc/Fc<sup>+</sup> couple. Solution-phase magnetic measurements were performed by Evans' method.<sup>7-10</sup> UV/vis spectra were recorded on a Perkin Elmer Lambda 1050+ spectrometer.

### X-ray Crystallography

Single-crystal X-ray diffraction studies were carried out on a Bruker SMART APEX

CCD diffractometer with graphite-monochromated Mo K $\alpha$  radiation ( $\lambda = 0.71073 \text{ \AA}$ ). Empirical absorption corrections were performed using the SADABS program.<sup>11</sup> All structures were solved by direct methods and refined by full-matrix least-squares procedures on  $F^2$  using SHELXTL2014<sup>12,13</sup> and solved with the Superflip structure solution program using charge flipping and refined with the XL refinement package using least squares minimization that is included in Olex2.<sup>14-16</sup> All of the non-hydrogen atoms were refined anisotropically. All of the hydrogen atoms on carbons were generated and refined in ideal positions. CCDC depositions 2290813 (**1**), 2346393 (**2**) 2357272 (*syn-3*), 2346394 (*anti-3*), 2368460 (**4**) can be obtained free of charge from the Cambridge Crystallographic Data Center.

### **Computational Details**

The PBE<sup>17,18</sup> functional in combination with the def2-TZVP<sup>19</sup> basis set were applied to geometry optimizations and the subsequent frequency analyses. The resolution of identity (RI)<sup>20</sup> approximation was employed to speed up the calculations. Moreover, the Becke–Johnson (D3BJ) damping was also utilized to take noncovlent corrections into account.<sup>21</sup>

## II. Experimental Procedures and Analytical Data

### Preparation of *syn*-[Cp\*Fe( $\mu$ -1 $\kappa^2$ SN:2 $\kappa^1$ S-bzmt)]<sub>2</sub>[PF<sub>6</sub>]<sub>2</sub> (**1**)

*Method A:* Bzmds (43 mg, 0.13 mmol) was added to a MeCN solution (5 mL) of [Cp\*Fe(MeCN)<sub>3</sub>][PF<sub>6</sub>] (119 mg, 0.26 mmol) at room temperature. The colour of the reaction mixture immediately changed from violet to yellow-brown. After being stirred for 1 h, the resultant solution was evaporated to dryness under vacuum. The solids were washed with *n*-hexane (3 mL  $\times$  3) to afford a yellow-brown powder **1** (110 mg, 0.11 mmol, 85%). Single-crystals suitable for X-ray diffraction analysis were obtained from a MeCN solution layered with Et<sub>2</sub>O at room temperature.

*Method B:* FcPF<sub>6</sub> (36 mg, 0.11 mmol) was added to a THF solution (5 mL) of **4** (94 mg, 0.11 mmol) at room temperature. The colour of the reaction mixture immediately changed from green to yellow-brown. After being stirred for 30 min, the resultant solution was evaporated to dryness under vacuum. The solids were washed with *n*-hexane (3 mL  $\times$  3) to afford a yellow-brown powder **1** (91 mg, 0.091 mmol, 83%). Single-crystals suitable for X-ray diffraction analysis were obtained from a MeCN solution layered with Et<sub>2</sub>O at room temperature.

<sup>1</sup>H NMR (400 MHz, CD<sub>3</sub>CN, ppm):  $\delta$  9.51 (s, 2H, NH), 7.31 (t, 2H, *J* = 7.6 Hz, Ph-*H*), 7.20 (t, 2H, *J* = 7.6 Hz, Ph-*H*), 6.95 (d, 2H, *J* = 4.1 Hz, Ph-*H*), 6.90 (d, 2H, *J* = 4.1 Hz, Ph-*H*), 4.46 (d, 2H, *J* = 9.5 Hz, CH<sub>2</sub>), 3.70 (d, 2H, *J* = 9.5 Hz, CH<sub>2</sub>), 1.38 (s, 30H, Cp\*-CH<sub>3</sub>). HRMS (ESI, *m/z*) calcd. for C<sub>36</sub>H<sub>44</sub>Fe<sub>2</sub>N<sub>4</sub>S<sub>2</sub> [1-2(PF<sub>6</sub>)]<sup>2+</sup>, 354.0854, found 354.0849. IR (Film, cm<sup>-1</sup>): 3380 ( $\nu_{\text{NH}}$ ), 3190, 3121, 2990, 2916, 1626, 1458, 1377, 1274, 1017, 843, 754, 561. UV/vis [ $\lambda_{\text{max}}$  (nm),  $\epsilon$  (M<sup>-1</sup>cm<sup>-1</sup>)]: 279 (18852), 318 (10362), 394 (5896), 462 (3833). Anal. Calcd. for C<sub>36</sub>H<sub>44</sub>Fe<sub>2</sub>N<sub>4</sub>S<sub>2</sub>P<sub>2</sub>F<sub>12</sub>: C, 43.30; H, 4.44; N, 5.61. Found: C, 43.10; H, 4.68; N, 5.65.

### Preparation of *syn*-[Cp\*Co( $\mu$ -1 $\kappa^2$ SN:2 $\kappa^1$ S-bzmt)]<sub>2</sub>[PF<sub>6</sub>]<sub>2</sub> (**2**)

To a precooled solution of [Cp\*CoI<sub>2</sub>(CO)] (362 mg, 0.76 mmol) in CH<sub>2</sub>Cl<sub>2</sub>:H<sub>2</sub>O = 1:1 (20 mL) was added with NaOAc (1.246 g, 15.20 mmol), KPF<sub>6</sub> (1.398 g, 7.60 mmol)

and bzmt (125 mg, 0.76 mmol) were added at room temperature. The colour of the reaction mixture gradually changed from violet-red to red. After stirring at room temperature for 12 h, the organic phase was collected and the aqueous phase was washed with a small amount of CH<sub>2</sub>Cl<sub>2</sub>. The combined CH<sub>2</sub>Cl<sub>2</sub> solution was dried over Na<sub>2</sub>SO<sub>4</sub> and filtered. The filtrate was dried under vacuum and washed with *n*-hexane (10 mL × 3) to afford a red powder **2** (351 mg, 0.35 mmol, 92%). Single-crystals suitable for X-ray diffraction analysis were obtained from a CH<sub>2</sub>Cl<sub>2</sub> solution layered with *n*-hexane at room temperature.

<sup>1</sup>H NMR (400 MHz, CD<sub>3</sub>CN, ppm): δ 9.70 (s, 2H, NH), 7.57 (d, 2H, *J* = 3.8 Hz, Ph-*H*), 7.48 (t, 2H, *J* = 7.2 Hz, Ph-*H*), 7.38 (t, 2H, *J* = 7.2 Hz, Ph-*H*), 7.11 (d, 2H, *J* = 3.8 Hz, Ph-*H*), 3.45 (d, 2H, *J* = 9.0 Hz, CH<sub>2</sub>), 3.06 (d, 2H, *J* = 9.0 Hz, CH<sub>2</sub>), 1.43 (s, 30H, Cp\*-CH<sub>3</sub>). HRMS (ESI, *m/z*) calcd. for C<sub>36</sub>H<sub>44</sub>Co<sub>2</sub>N<sub>4</sub>S<sub>2</sub> [2-(PF<sub>6</sub>)]<sup>2+</sup>, 357.0836, found 357.0827. IR (Film, cm<sup>-1</sup>): 3364 (ν<sub>NH</sub>), 2967, 2920, 1452, 1276, 1018, 841, 749, 558. UV/vis [λ<sub>max</sub> (nm), ε (M<sup>-1</sup>cm<sup>-1</sup>)]: 280 (22472), 367 (15054), 530 (2979). Anal. Calcd. for C<sub>36</sub>H<sub>44</sub>Co<sub>2</sub>N<sub>4</sub>S<sub>2</sub>P<sub>2</sub>F<sub>12</sub>: C, 43.04; H, 4.41; N, 5.58. Found: C, 43.05; H, 4.90; N, 5.39.

**Preparation of *syn*-[Cp\**Ru*(μ-1κ<sup>2</sup>SN:2κ<sup>1</sup>S-bzmt)]<sub>2</sub>[PF<sub>6</sub>]<sub>2</sub> (*syn*-**3**) and *anti*-[Cp\**Ru*(μ-1κ<sup>2</sup>SN:2κ<sup>1</sup>S-bzmt)]<sub>2</sub>[PF<sub>6</sub>]<sub>2</sub> (*anti*-**3**)**

Bzmds (33 mg, 0.10 mmol) was added to a MeCN solution (15 mL) of [Cp\**Ru*(MeCN)<sub>3</sub>][PF<sub>6</sub>] (100 mg, 0.20 mmol) at room temperature. The colour of the reaction mixture immediately changed from orange-yellow to yellow-brown. After being stirred for 1 h, the resultant solution was evaporated to dryness under vacuum. The solids were extracted with THF (5 mL × 3) and dried under vacuum. The extracted solids were washed with *n*-hexane (3 mL × 3) to afford a yellow-brown powder *syn*-**3** (81 mg, 0.074 mmol, 74%). Single-crystals suitable for X-ray diffraction analysis were obtained from a CH<sub>2</sub>Cl<sub>2</sub> solution layered with *n*-hexane at room temperature.

<sup>1</sup>H NMR (400 MHz, CD<sub>3</sub>CN, ppm): δ 9.64 (s, 2H, NH), 7.37 (t, 2H, *J* = 7.5 Hz, Ph-*H*), 7.28 (t, 2H, *J* = 7.5 Hz, Ph-*H*), 7.05 (d, 2H, *J* = 4.1 Hz, Ph-*H*), 7.01 (d, 2H, *J* = 4.1 Hz, Ph-*H*), 4.06 (d, 2H, *J* = 9.5 Hz, CH<sub>2</sub>), 3.42 (d, 2H, *J* = 9.5 Hz, CH<sub>2</sub>), 1.77 (s, 30H, Cp\*-

*CH*<sub>3</sub>). IR (Film, cm<sup>-1</sup>): 3390 ( $\nu_{\text{NH}}$ ), 2962, 2921, 2848, 1646, 1454, 1380, 1277, 1023, 840, 750, 559. UV/vis [ $\lambda_{\text{max}}$  (nm),  $\epsilon$  (M<sup>-1</sup>cm<sup>-1</sup>): 280 (22048), 369 (9910). Anal. Calcd. for C<sub>36</sub>H<sub>44</sub>Ru<sub>2</sub>N<sub>4</sub>S<sub>2</sub>P<sub>2</sub>F<sub>12</sub>: C, 39.71; H, 4.07; N, 5.15. Found: C, 40.88; H, 4.47; N, 5.27.

The residual solids were washed with *n*-hexane (3 mL  $\times$  3) to afford a green powder *anti*-**3** (16 mg, 0.015 mmol, 15%). Single-crystals suitable for X-ray diffraction analysis were obtained from a MeCN solution layered with Et<sub>2</sub>O at room temperature.

<sup>1</sup>H NMR (400 MHz, CD<sub>3</sub>CN, ppm):  $\delta$  10.97 (s, 2H, NH), 7.48–7.35 (8H, Ph-*H*), 4.45 (s, 4H, CH<sub>2</sub>), 1.30 (s, 30H, Cp\*-CH<sub>3</sub>). HRMS (ESI, *m/z*) calcd. for C<sub>36</sub>H<sub>44</sub>Ru<sub>2</sub>N<sub>4</sub>S<sub>2</sub> [**3**-2(PF<sub>6</sub>)]<sup>2+</sup>, 400.0556, found 400.0555. IR (Film, cm<sup>-1</sup>): 3382 ( $\nu_{\text{NH}}$ ), 2963, 2920, 2770, 1453, 1400, 1285, 1018, 841, 765, 558. UV/vis [ $\lambda_{\text{max}}$  (nm),  $\epsilon$  (M<sup>-1</sup>cm<sup>-1</sup>): 279 (19845), 319 (8983), 398 (7166). Anal. Calcd. for C<sub>36</sub>H<sub>44</sub>Ru<sub>2</sub>N<sub>4</sub>S<sub>2</sub>P<sub>2</sub>F<sub>12</sub>: C, 39.71; H, 4.07; N, 5.15. Found: C, 39.44; H, 4.44; N, 4.96.

#### Preparation of *syn*-[Cp\*Fe( $\mu$ -1 $\kappa^2$ SN:2 $\kappa^1$ S-bzmt)]<sub>2</sub>[PF<sub>6</sub>] (**4**)

KC<sub>8</sub> (34 mg, 0.25 mmol) was added to a THF solution (15 mL) of **1** (210 mg, 0.21 mmol) at -78 °C. The colour of the reaction mixture gradually changed from yellow-brown to green. The mixture was stirred and gradually warmed to ambient temperature. The resulting green solution was evaporated to dryness under reduced pressure. The residue was extracted with CH<sub>2</sub>Cl<sub>2</sub> (5 mL  $\times$  3) and dried under vacuum to afford a green powder **4** (102 mg, 0.12 mmol, 57%). Single-crystals suitable for X-ray diffraction analysis were obtained from a CH<sub>2</sub>Cl<sub>2</sub> solution layered with *n*-hexane at room temperature.

HRMS (ESI, *m/z*) calcd. for C<sub>36</sub>H<sub>44</sub>Fe<sub>2</sub>N<sub>4</sub>S<sub>2</sub> [**4**-PF<sub>6</sub>]<sup>+</sup>, 708.1708, found 708.1711. IR (Film, cm<sup>-1</sup>): 3366 ( $\nu_{\text{NH}}$ ), 2963, 2921, 1627, 1455, 1377, 1021, 840, 754, 559. UV/vis [ $\lambda_{\text{max}}$  (nm),  $\epsilon$  (M<sup>-1</sup>cm<sup>-1</sup>): 278 (2534), 472 (252), 830(5).  $\mu_{\text{eff}}$  (CD<sub>2</sub>Cl<sub>2</sub>, Evans' method, 25 °C) = 1.50  $\pm$  0.05  $\mu_{\text{B}}$ . Complex **4** is extremely sensitive to air and therefore cannot provide elemental analysis data.

### III. X-ray Crystallographic Data

**Table S1.** Crystallographic data for **1**·MeCN and **2**·2CH<sub>2</sub>Cl<sub>2</sub>.

|                                                                         | <b>1</b> ·MeCN                                                                                               | <b>2</b> ·2CH <sub>2</sub> Cl <sub>2</sub>                                                                                   |
|-------------------------------------------------------------------------|--------------------------------------------------------------------------------------------------------------|------------------------------------------------------------------------------------------------------------------------------|
| Formula                                                                 | C <sub>38</sub> H <sub>47</sub> F <sub>12</sub> Fe <sub>2</sub> N <sub>5</sub> P <sub>2</sub> S <sub>2</sub> | C <sub>38</sub> H <sub>48</sub> Cl <sub>4</sub> Co <sub>2</sub> F <sub>12</sub> N <sub>4</sub> P <sub>2</sub> S <sub>2</sub> |
| Formula weight                                                          | 1039.56                                                                                                      | 1174.52                                                                                                                      |
| Crystal dimensions (mm <sup>3</sup> )                                   | 0.32×0.25×0.23                                                                                               | 0.33×0.31×0.29                                                                                                               |
| Crystal system                                                          | Triclinic                                                                                                    | Monoclinic                                                                                                                   |
| Space group                                                             | P-1                                                                                                          | P2 <sub>1</sub> /n                                                                                                           |
| a (Å)                                                                   | 10.992(3)                                                                                                    | 11.5804(8)                                                                                                                   |
| b (Å)                                                                   | 11.940(4)                                                                                                    | 36.884(3)                                                                                                                    |
| c (Å)                                                                   | 17.155(5)                                                                                                    | 12.2830(9)                                                                                                                   |
| α (°)                                                                   | 92.109(3)                                                                                                    | 90                                                                                                                           |
| β (°)                                                                   | 101.285(3)                                                                                                   | 117.113(3)                                                                                                                   |
| γ (°)                                                                   | 102.490(3)                                                                                                   | 90                                                                                                                           |
| Volume (Å <sup>3</sup> )                                                | 2148.2(11)                                                                                                   | 4670.0(6)                                                                                                                    |
| Z                                                                       | 2                                                                                                            | 4                                                                                                                            |
| T (K)                                                                   | 200.0                                                                                                        | 120.0                                                                                                                        |
| D <sub>calcd</sub> (g cm <sup>-3</sup> )                                | 1.607                                                                                                        | 1.671                                                                                                                        |
| μ (mm <sup>-1</sup> )                                                   | 0.935                                                                                                        | 1.180                                                                                                                        |
| F (000)                                                                 | 1064.0                                                                                                       | 2384.0                                                                                                                       |
| No. of rflns. collected                                                 | 16524                                                                                                        | 44435                                                                                                                        |
| No. of indep. rflns. /R <sub>int</sub>                                  | 7423/0.0472,                                                                                                 | 8134/0.1427                                                                                                                  |
| No. of obsd. rflns. [I <sub>0</sub> > 2σ(I <sub>0</sub> )]              | 5925                                                                                                         | 4801                                                                                                                         |
| Data / restraints / parameters                                          | 7423/228/616                                                                                                 | 8134/181/624                                                                                                                 |
| R <sub>1</sub> / wR <sub>2</sub> [I <sub>0</sub> > 2σ(I <sub>0</sub> )] | 0.0525/0.1505                                                                                                | 0.0953/0.1797                                                                                                                |
| R <sub>1</sub> / wR <sub>2</sub> (all data)                             | 0.0672/0.1610                                                                                                | 0.1610/0.2050                                                                                                                |
| GOF (on F <sup>2</sup> )                                                | 1.137                                                                                                        | 1.035                                                                                                                        |
| Largest diff. peak and hole (e Å <sup>-3</sup> )                        | 0.67/-0.65                                                                                                   | 0.81/-0.67                                                                                                                   |
| CCDC No.                                                                | 2290813                                                                                                      | 2346393                                                                                                                      |



**Table S2.** Crystallographic data for *syn-3*·CH<sub>2</sub>Cl<sub>2</sub> and *anti-3*·2MeCN.

|                                                                         | <i>syn-3</i> ·CH <sub>2</sub> Cl <sub>2</sub>                                                                                | <i>anti-3</i> ·2MeCN                                                                                         |
|-------------------------------------------------------------------------|------------------------------------------------------------------------------------------------------------------------------|--------------------------------------------------------------------------------------------------------------|
| Formula                                                                 | C <sub>37</sub> H <sub>46</sub> Cl <sub>2</sub> F <sub>12</sub> N <sub>4</sub> P <sub>2</sub> Ru <sub>2</sub> S <sub>2</sub> | C <sub>40</sub> H <sub>50</sub> F <sub>12</sub> N <sub>6</sub> P <sub>2</sub> Ru <sub>2</sub> S <sub>2</sub> |
| Formula weight                                                          | 1173.88                                                                                                                      | 1171.06                                                                                                      |
| Crystal dimensions (mm <sup>3</sup> )                                   | 0.27×0.25×0.22                                                                                                               | 0.29×0.27×0.23                                                                                               |
| Crystal system                                                          | Orthorhombic                                                                                                                 | Monoclinic                                                                                                   |
| Space group                                                             | P2 <sub>1</sub> 2 <sub>1</sub> 2 <sub>1</sub>                                                                                | P2 <sub>1</sub> /n                                                                                           |
| a (Å)                                                                   | 12.7973(18)                                                                                                                  | 11.290(2)                                                                                                    |
| b (Å)                                                                   | 16.870(2)                                                                                                                    | 15.799(3)                                                                                                    |
| c (Å)                                                                   | 20.971(3)                                                                                                                    | 13.395(3)                                                                                                    |
| α (°)                                                                   | 90                                                                                                                           | 90                                                                                                           |
| β (°)                                                                   | 90                                                                                                                           | 110.230(5)                                                                                                   |
| γ (°)                                                                   | 90                                                                                                                           | 90                                                                                                           |
| Volume (Å <sup>3</sup> )                                                | 4527.4(11)                                                                                                                   | 2241.9(8)                                                                                                    |
| Z                                                                       | 4                                                                                                                            | 2                                                                                                            |
| T (K)                                                                   | 200.0                                                                                                                        | 120.0                                                                                                        |
| D <sub>calcd</sub> (g cm <sup>-3</sup> )                                | 1.722                                                                                                                        | 1.735                                                                                                        |
| μ (mm <sup>-1</sup> )                                                   | 1.031                                                                                                                        | 0.927                                                                                                        |
| F (000)                                                                 | 2352.0                                                                                                                       | 1180.0                                                                                                       |
| No. of rflns. collected                                                 | 53085                                                                                                                        | 38133                                                                                                        |
| No. of indep. rflns. /R <sub>int</sub>                                  | 7928/0.0800                                                                                                                  | 3936/0.1018                                                                                                  |
| No. of obsd. rflns. [I <sub>0</sub> > 2σ(I <sub>0</sub> )]              | 6208                                                                                                                         | 3322                                                                                                         |
| Data / restraints / parameters                                          | 7928/204/561                                                                                                                 | 3936/0/295                                                                                                   |
| R <sub>1</sub> / wR <sub>2</sub> [I <sub>0</sub> > 2σ(I <sub>0</sub> )] | 0.0610/0.1182                                                                                                                | 0.0408/0.0890                                                                                                |
| R <sub>1</sub> / wR <sub>2</sub> (all data)                             | 0.0934/0.1253                                                                                                                | 0.0509/0.0955                                                                                                |
| GOF (on F <sup>2</sup> )                                                | 1.131                                                                                                                        | 1.072                                                                                                        |
| Largest diff. peak and hole (e Å <sup>-3</sup> )                        | 1.86/−0.73                                                                                                                   | 0.74/−0.57                                                                                                   |
| CCDC No.                                                                | 2357272                                                                                                                      | 2346394                                                                                                      |

**Table S3.** Crystallographic data for **4**.

| <b>4</b>                                         |                                                                                               |
|--------------------------------------------------|-----------------------------------------------------------------------------------------------|
| Formula                                          | C <sub>36</sub> H <sub>44</sub> F <sub>6</sub> Fe <sub>2</sub> N <sub>4</sub> PS <sub>2</sub> |
| Formula weight                                   | 853.54                                                                                        |
| Crystal dimensions (mm <sup>3</sup> )            | 0.25×0.23× 0.22                                                                               |
| Crystal system                                   | Monoclinic                                                                                    |
| Space group                                      | P2 <sub>1</sub> /c                                                                            |
| a (Å)                                            | 17.5444(16)                                                                                   |
| b (Å)                                            | 14.6053(14)                                                                                   |
| c (Å)                                            | 14.6529(15)                                                                                   |
| $\alpha$ (°)                                     | 90                                                                                            |
| $\beta$ (°)                                      | 95.899(2)                                                                                     |
| $\gamma$ (°)                                     | 90                                                                                            |
| Volume (Å <sup>3</sup> )                         | 3734.8(6)                                                                                     |
| Z                                                | 4                                                                                             |
| T (K)                                            | 298.0                                                                                         |
| $D_{\text{calcd}}$ (g cm <sup>-3</sup> )         | 1.518                                                                                         |
| $\mu$ (mm <sup>-1</sup> )                        | 0.994                                                                                         |
| $F(000)$                                         | 1764.0                                                                                        |
| No. of rflns. collected                          | 39527                                                                                         |
| No. of indep. rflns. / $R_{\text{int}}$          | 6580/0.1391                                                                                   |
| No. of obsd. rflns. [ $I_0 > 2\sigma(I_0)$ ]     | 4202                                                                                          |
| Data / restraints / parameters                   | 6580/0/470                                                                                    |
| $R_1 / wR_2$ [ $I_0 > 2\sigma(I_0)$ ]            | 0.0584/0.1155                                                                                 |
| $R_1 / wR_2$ (all data)                          | 0.1123/0.1287                                                                                 |
| GOF (on $F^2$ )                                  | 1.029                                                                                         |
| Largest diff. peak and hole (e Å <sup>-3</sup> ) | 0.50/−0.38                                                                                    |
| CCDC No.                                         | 2368460                                                                                       |

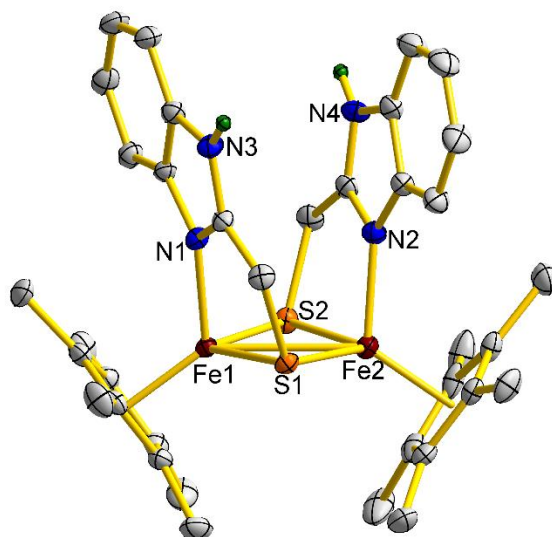

**Figure S1.** ORTEP diagram of **1**·MeCN. Thermal ellipsoids are shown at 30% probability level. Hydrogen atoms on carbons, one co-crystallized MeCN molecule and two PF<sub>6</sub><sup>-</sup> counter anions are omitted for clarity.

**Table S4.** Selected bond distances and angles for **1**·MeCN.

| Distances (Å)      |            |            |            |
|--------------------|------------|------------|------------|
| Fe1–Fe2            | 2.7892(8)  |            |            |
| Fe1–S1             | 2.2427(10) | Fe2–S1     | 2.2178(11) |
| Fe1–S2             | 2.2193(11) | Fe2–S2     | 2.2453(10) |
| Fe1–N1             | 1.994(3)   | Fe2–N2     | 1.997(3)   |
| Fe1–Cp*1           | 1.7744(7)  | Fe2–Cp*2   | 1.7817(7)  |
| Angles (°)         |            |            |            |
| Fe1–S1–Fe2         | 77.41(3)   | Fe1–S2–Fe2 | 77.32(3)   |
| Torsion angles (°) |            |            |            |
| S2–Fe2Fe1–S1       | 173.75(5)  |            |            |
| Dihedral angle (°) |            |            |            |
| Cp*1∠Cp*2          | 73.3(2)    | Ph1∠Ph2    | 12.9(1)    |

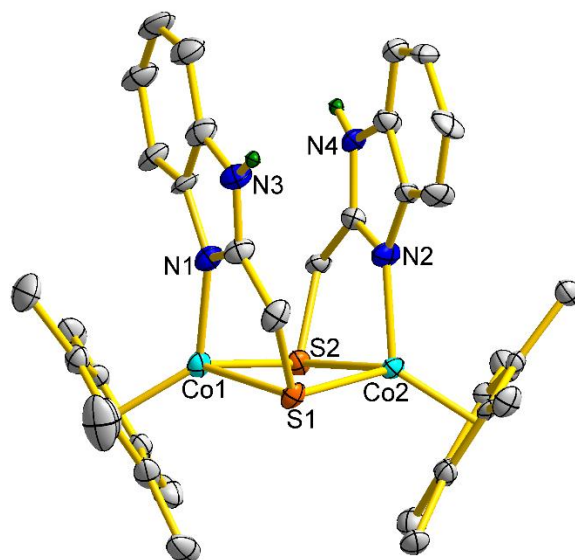

**Figure S2.** ORTEP diagram of  $2 \cdot 2\text{CH}_2\text{Cl}_2$ . Thermal ellipsoids are shown at 30% probability level. Hydrogen atoms on carbons, two co-crystallized  $\text{CH}_2\text{Cl}_2$  molecules and two  $\text{PF}_6^-$  counter anions are omitted for clarity.

**Table S5.** Selected bond distances and angles for  $2 \cdot 2\text{CH}_2\text{Cl}_2$ .

| Distances (Å)      |          |                  |          |
|--------------------|----------|------------------|----------|
| Co1 $\cdots$ Co2   | 3.321(2) |                  |          |
| Co1–S1             | 2.259(2) | Co2–S1           | 2.262(2) |
| Co1–S2             | 2.280(2) | Co2–S2           | 2.271(2) |
| Co1–N1             | 1.958(7) | Co2–N2           | 1.941(7) |
| Co1–Cp*1           | 1.696(2) | Co2–Cp*2         | 1.696(1) |
| Angles (°)         |          |                  |          |
| Co1–S1–Co2         | 94.56(9) | Co1–S2–Co2       | 93.73(8) |
| Torsion angles (°) |          |                  |          |
| S2–Co2Co1–S1       | 163.2(1) |                  |          |
| Dihedral angle (°) |          |                  |          |
| Cp*1 $\angle$ Cp*2 | 64.5(3)  | Ph1 $\angle$ Ph2 | 2.5(3)   |

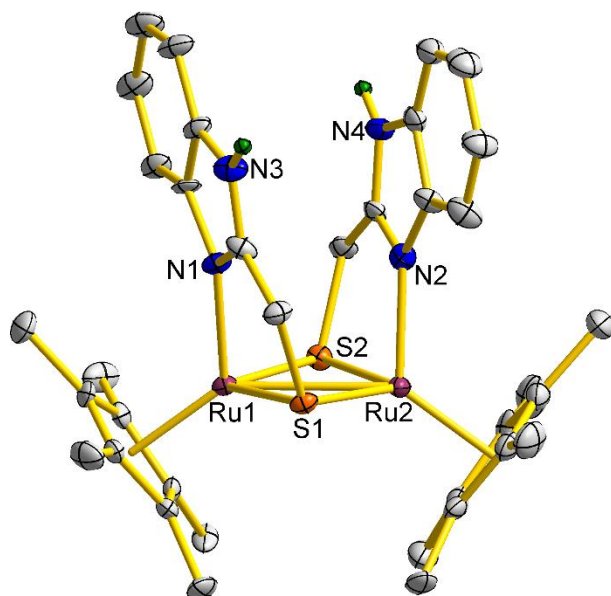

**Figure S3.** ORTEP diagram of *syn-3*·CH<sub>2</sub>Cl<sub>2</sub>. Thermal ellipsoids are shown at 30% probability level. Hydrogen atoms on carbons, one co-crystallized CH<sub>2</sub>Cl<sub>2</sub> molecule and two PF<sub>6</sub><sup>−</sup> counter anions are omitted for clarity.

**Table S6.** Selected bond distances and angles for *syn-3*·CH<sub>2</sub>Cl<sub>2</sub>.

| Distances (Å)      |            |            |            |
|--------------------|------------|------------|------------|
| Ru1–Ru2            | 2.8269(14) |            |            |
| Ru1–S1             | 2.306(3)   | Ru2–S1     | 2.310(3)   |
| Ru1–S2             | 2.311(3)   | Ru2–S2     | 2.317(3)   |
| Ru1–N1             | 2.118(10)  | Ru2–N2     | 2.101(10)  |
| Ru1–Cp*1           | 1.8719(9)  | Ru2–Cp*2   | 1.8718(11) |
| Angles (°)         |            |            |            |
| Ru1–S1–Ru2         | 75.54(10)  | Ru1–S2–Ru2 | 75.29(10)  |
| Torsion angles (°) |            |            |            |
| S2–Ru1Ru2–S1       | 173.9(2)   |            |            |
| Dihedral angle (°) |            |            |            |
| Cp*1∠Cp*2          | 74.8(5)    | Ph1∠Ph2    | 8.8(4)     |

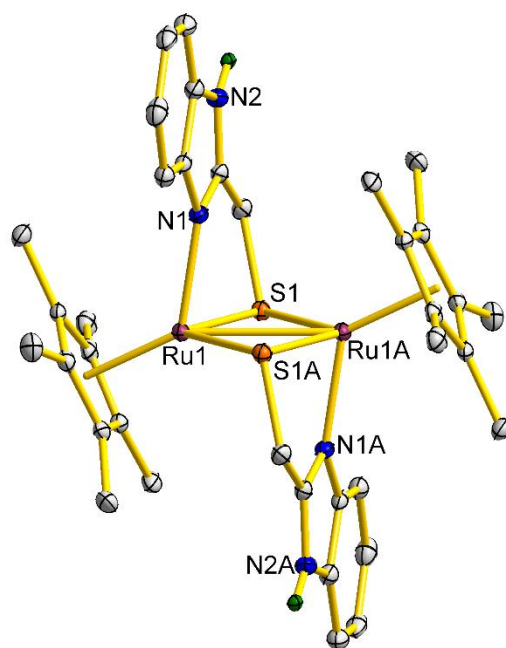

**Figure S4.** ORTEP diagram of *anti-3*·2MeCN. Thermal ellipsoids are shown at 30% probability level. Hydrogen atoms on carbons, two co-crystallized MeCN molecules and two PF<sub>6</sub><sup>−</sup> counter anions are omitted for clarity.

**Table S7.** Selected bond distances and angles for *anti-3*·2MeCN.

| Distances (Å)      |            |            |            |
|--------------------|------------|------------|------------|
| Ru1–Ru2            | 2.8339(7)  |            |            |
| Ru1–S1             | 2.3051(11) | Ru1A–S1    | 2.3070(11) |
| Ru1–S1A            | 2.3070(11) | Ru1A–S1A   | 2.3051(11) |
| Ru1–N1             | 2.106(3)   | Ru1A–N1A   | 2.106(3)   |
| Ru1–Cp*1           | 1.8665(4)  | Ru1A–Cp*1A | 1.8665(4)  |
| Angles (°)         |            |            |            |
| Ru1–S1–Ru1A        | 75.82(3)   |            |            |
| Torsion angles (°) |            |            |            |
| S2–Ru1Ru1A–S1      | 180.00(5)  |            |            |
| Dihedral angle (°) |            |            |            |
| Cp*1∠Cp*1A         | 0.0(2)     | Ph1∠Ph2    | 0.0(2)     |

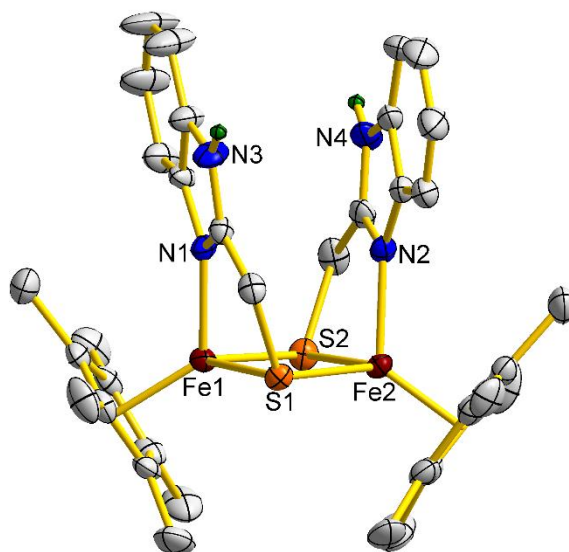

**Figure S5.** ORTEP diagram of **4**. Thermal ellipsoids are shown at 30% probability level. Hydrogen atoms on carbons and one  $\text{PF}_6^-$  counter anion are omitted for clarity.

**Table S8.** Selected bond distances and angles for **4**.

| Distances (Å)      |            |            |            |
|--------------------|------------|------------|------------|
| Fe1...Fe2          | 3.0494(8)  |            |            |
| Fe1–S1             | 2.2727(12) | Fe2–S1     | 2.2419(12) |
| Fe1–S2             | 2.2489(13) | Fe2–S2     | 2.2729(12) |
| Fe1–N1             | 2.001(3)   | Fe2–N2     | 1.998(3)   |
| Fe1–Cp*1           | 1.7413(5)  | Fe2–Cp*2   | 1.7360(6)  |
| Angles (°)         |            |            |            |
| Fe1–S1–Fe2         | 84.97(4)   | Fe1–S2–Fe2 | 84.81(4)   |
| Torsion angles (°) |            |            |            |
| S2–Fe2Fe1–S1       | 176.74(6)  |            |            |
| Dihedral angle (°) |            |            |            |
| Cp*1∠Cp*2          | 70.4(2)    | Ph1∠Ph2    | 7.7(2)     |

#### IV. NMR Spectra

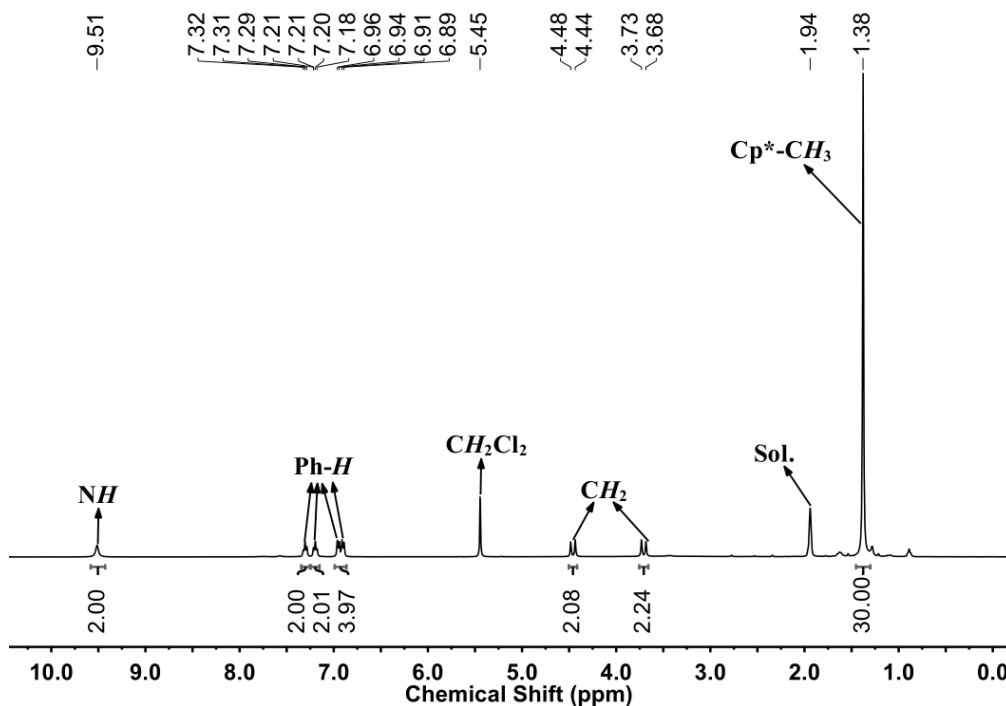

Figure S6. <sup>1</sup>H NMR spectrum of **1** in CD<sub>3</sub>CN.

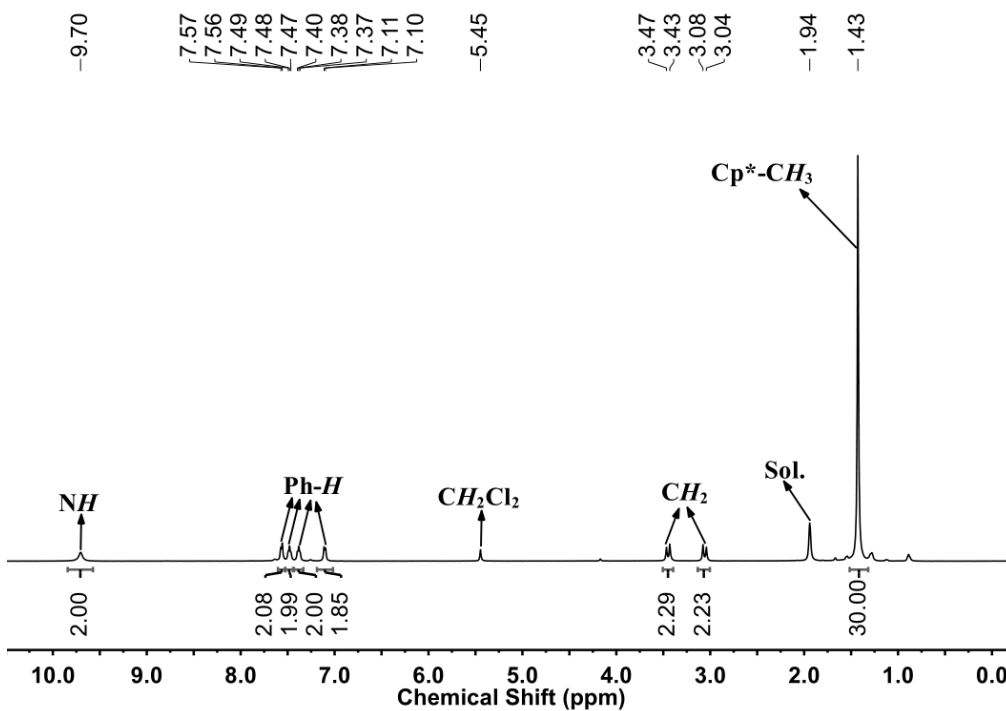

Figure S7. <sup>1</sup>H NMR spectrum of **2** in CD<sub>3</sub>CN.



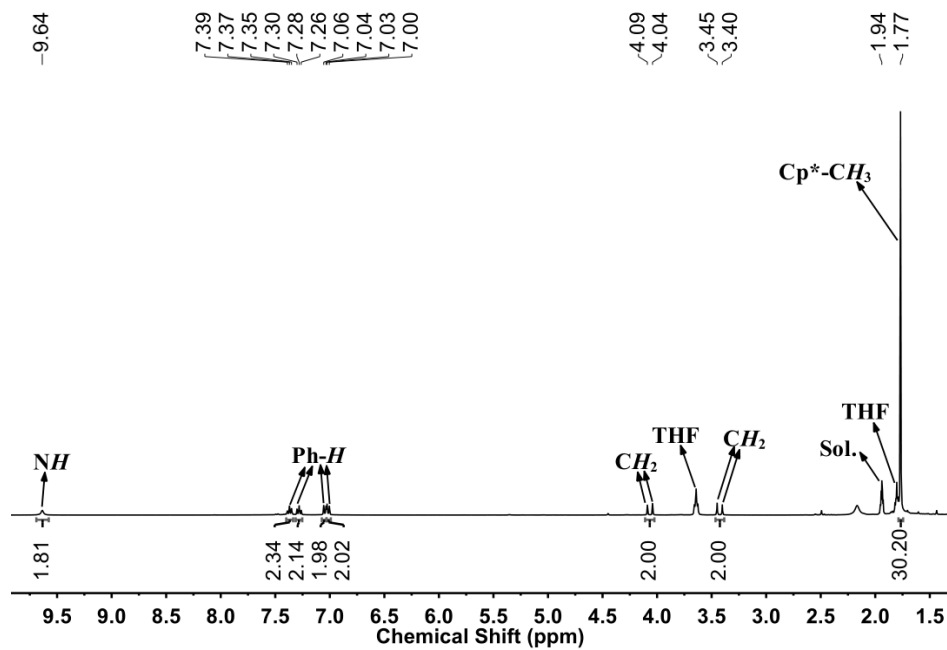

**Figure S8.** <sup>1</sup>H NMR spectrum of *syn-3* in CD<sub>3</sub>CN.

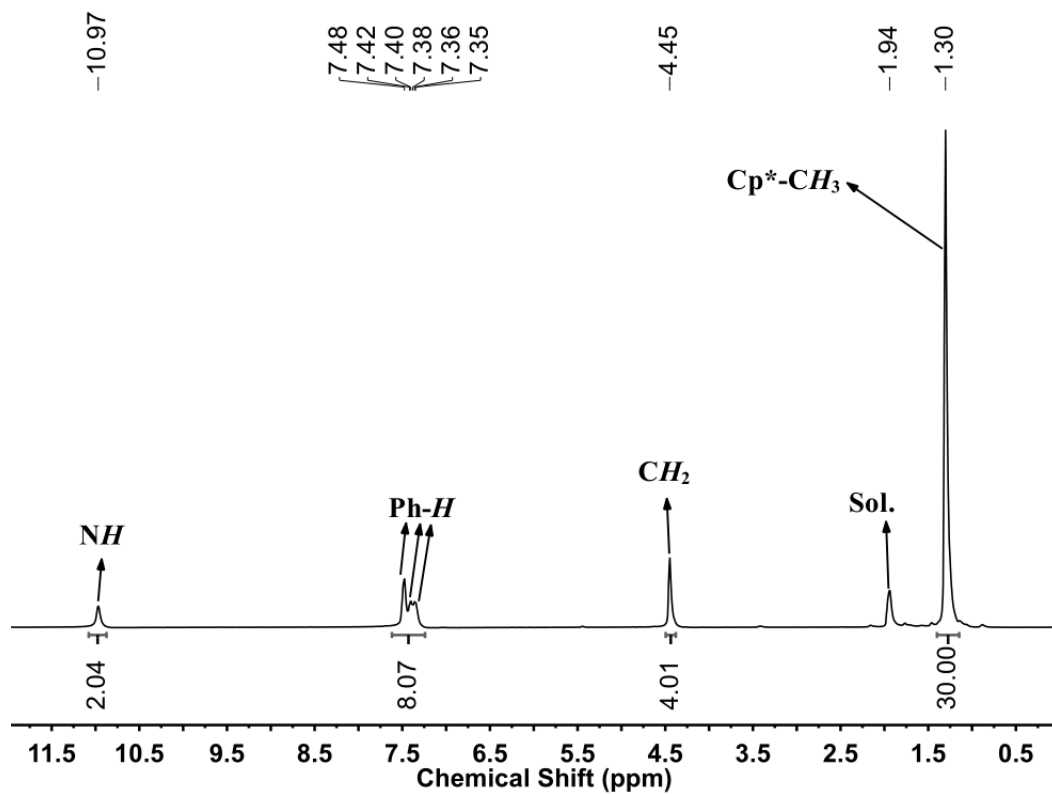

**Figure S9.** <sup>1</sup>H NMR spectrum of *anti-3* in CD<sub>3</sub>CN.

## V. IR Spectra

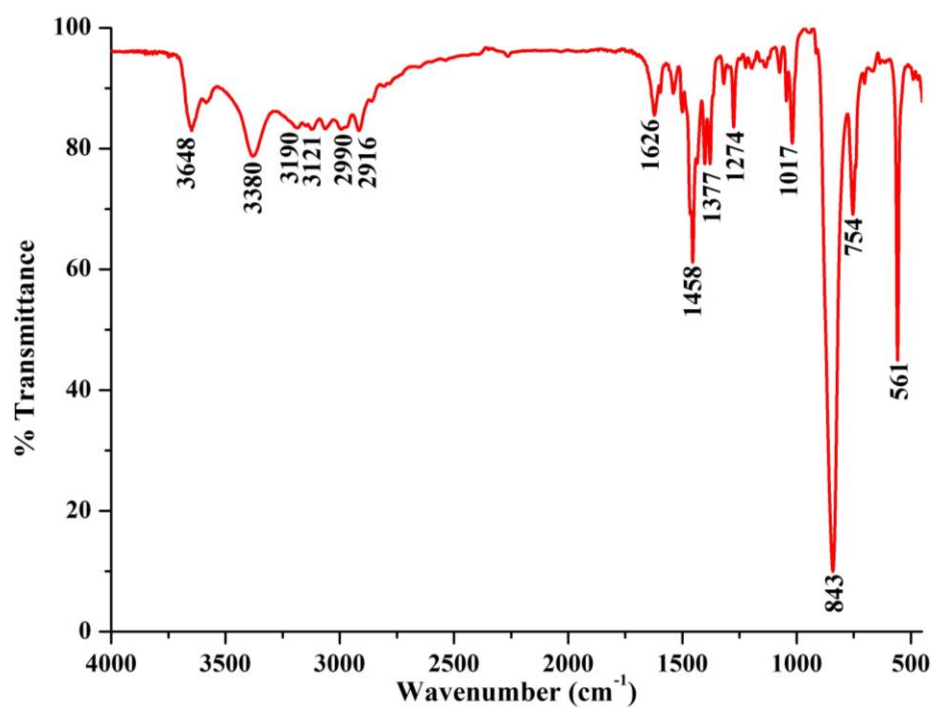

Figure S10. IR spectrum (Film) of 1.

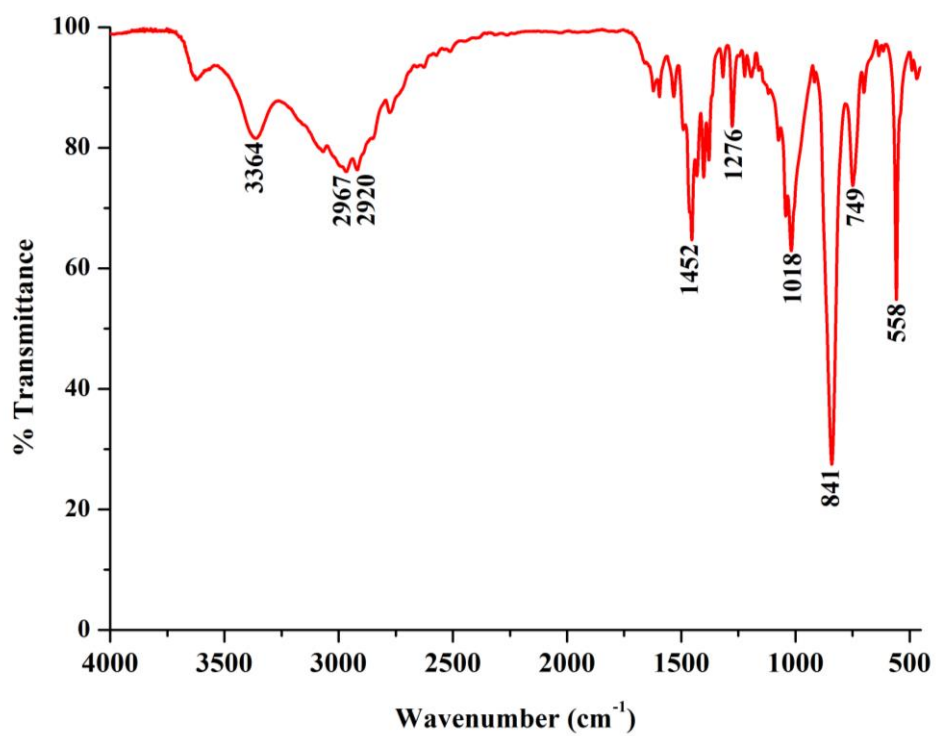

Figure S11. IR spectrum (Film) of 2.

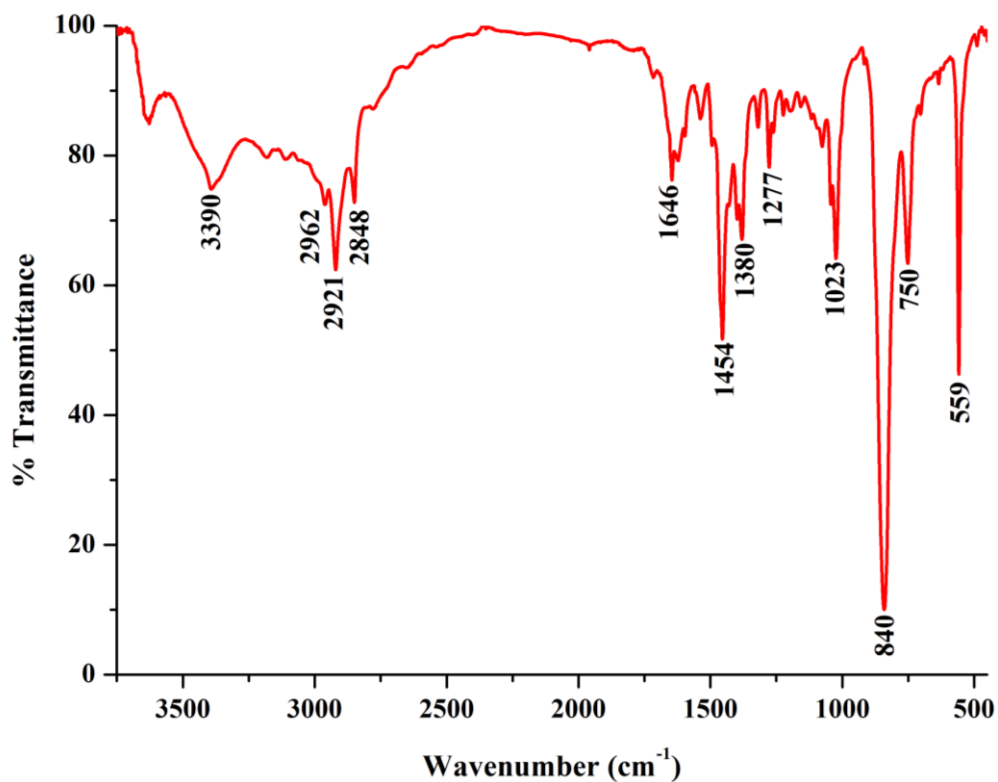

Figure S12. IR spectrum (Film) of *syn-3*.

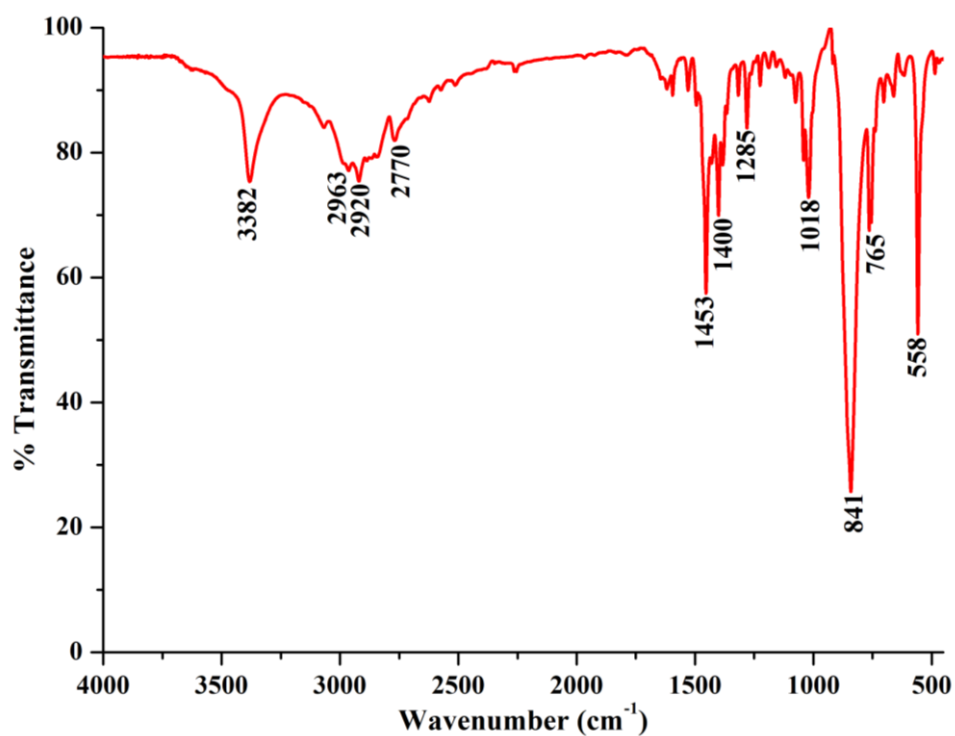

Figure S13. IR spectrum (Film) of *anti-3*.

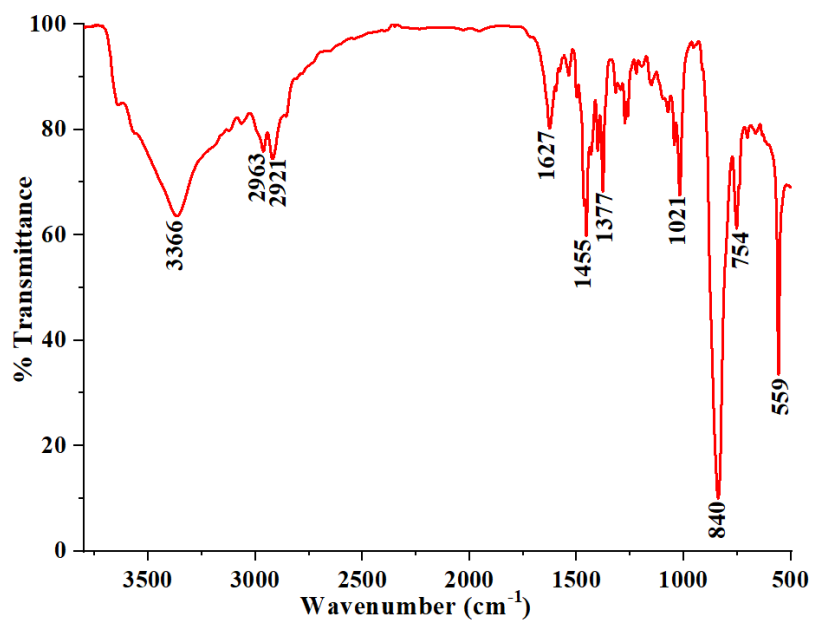

**Figure S14.** IR spectrum (Film) of 4.

## VI. ESI High-resolution Mass Spectra

(a)

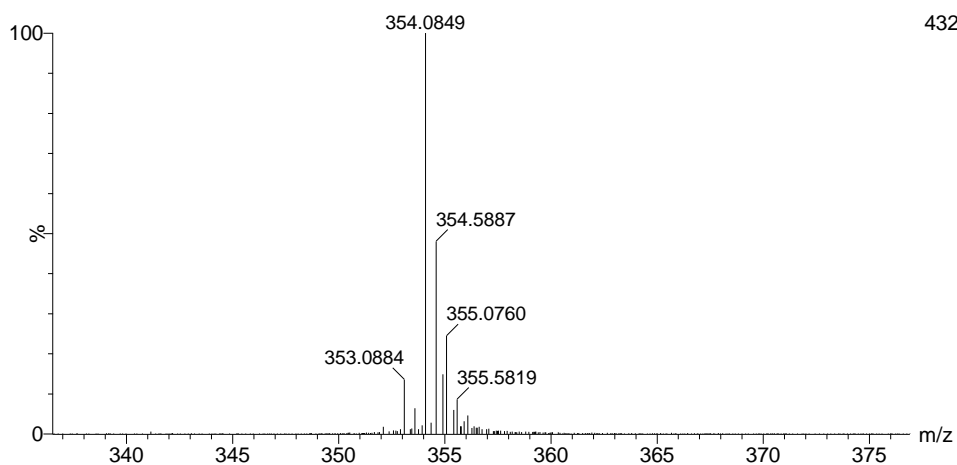

(b)

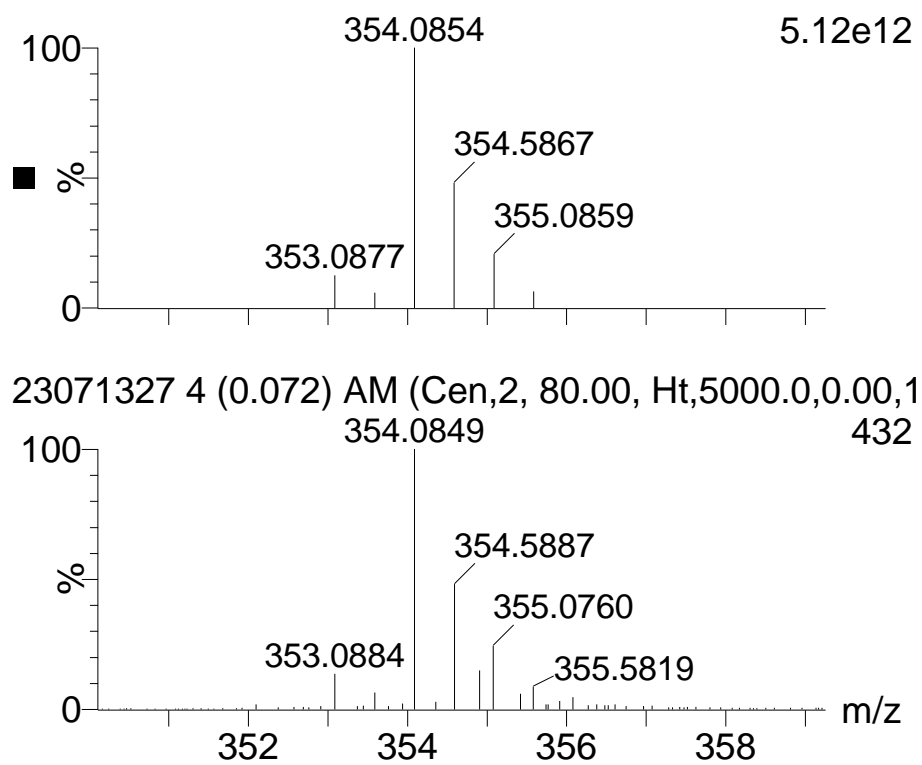

**Figure S15.** ESI-HRMS of **1** in CH<sub>2</sub>Cl<sub>2</sub>.

(a) The signal at  $m/z$  354.0849 corresponds to  $[\mathbf{1}-2(\text{PF}_6)]^{2+}$ .

(b) Calculated isotopic distribution for  $[\mathbf{1}-2(\text{PF}_6)]^{2+}$  (upper) and the amplifying experimental diagram for  $[\mathbf{1}-2(\text{PF}_6)]^{2+}$  (bottom).

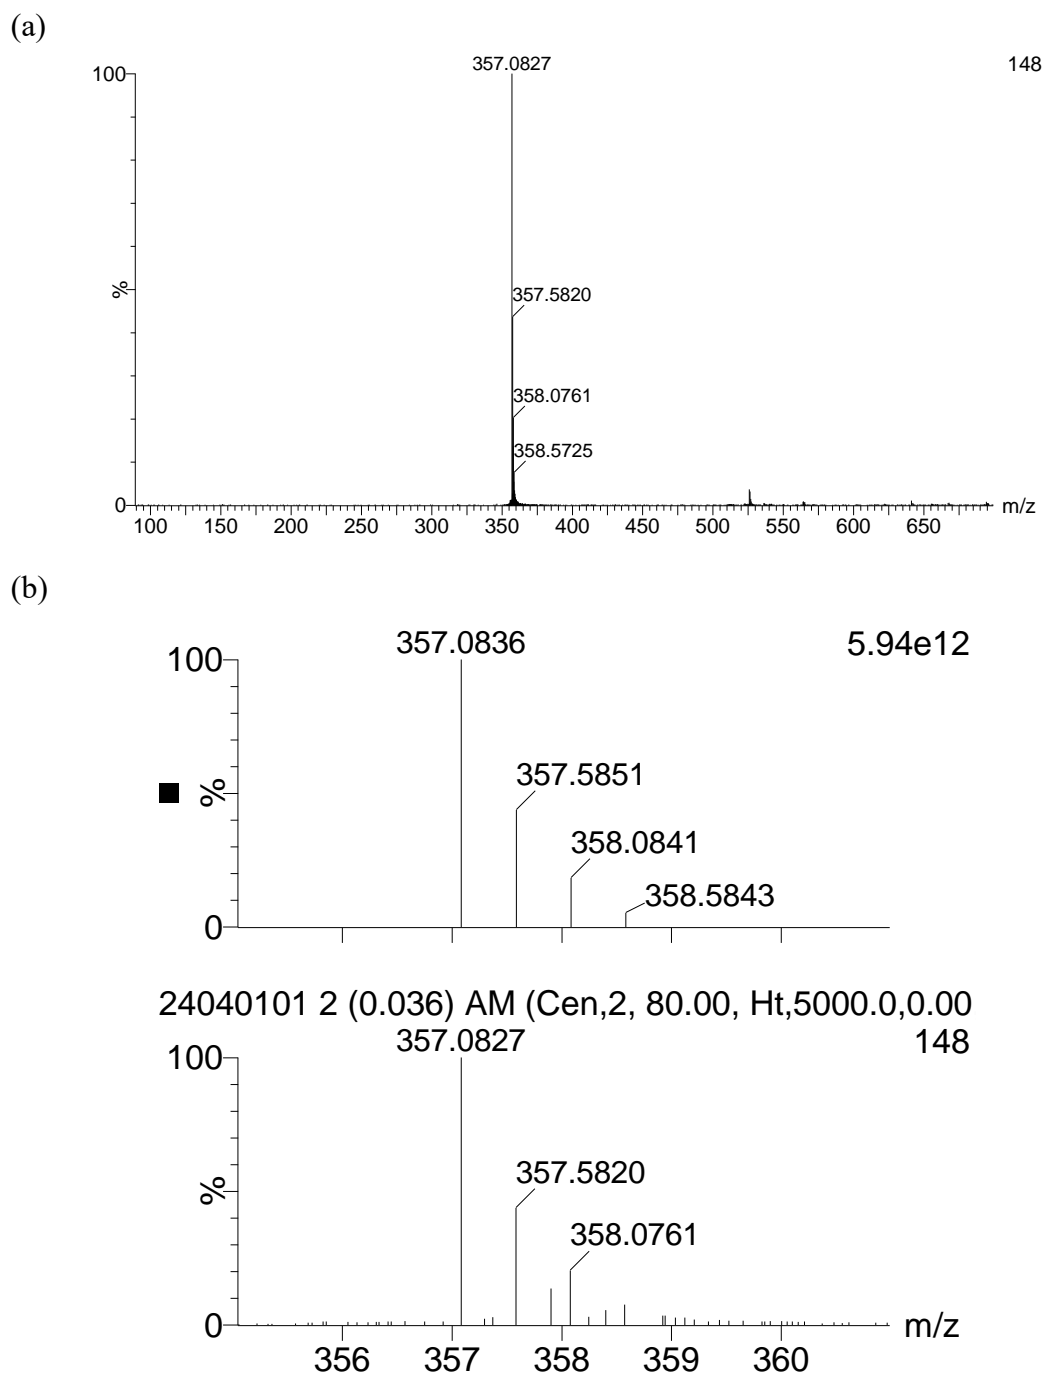

**Figure S16.** ESI-HRMS of **2** in  $\text{CH}_2\text{Cl}_2$ .

(a) The signal at  $m/z$  357.0827 corresponds to  $[\mathbf{2}-2(\text{PF}_6)]^{2+}$ .

(b) Calculated isotopic distribution for  $[\mathbf{2}-2(\text{PF}_6)]^{2+}$  (upper) and the amplifying experimental diagram for  $[\mathbf{2}-2(\text{PF}_6)]^{2+}$  (bottom).

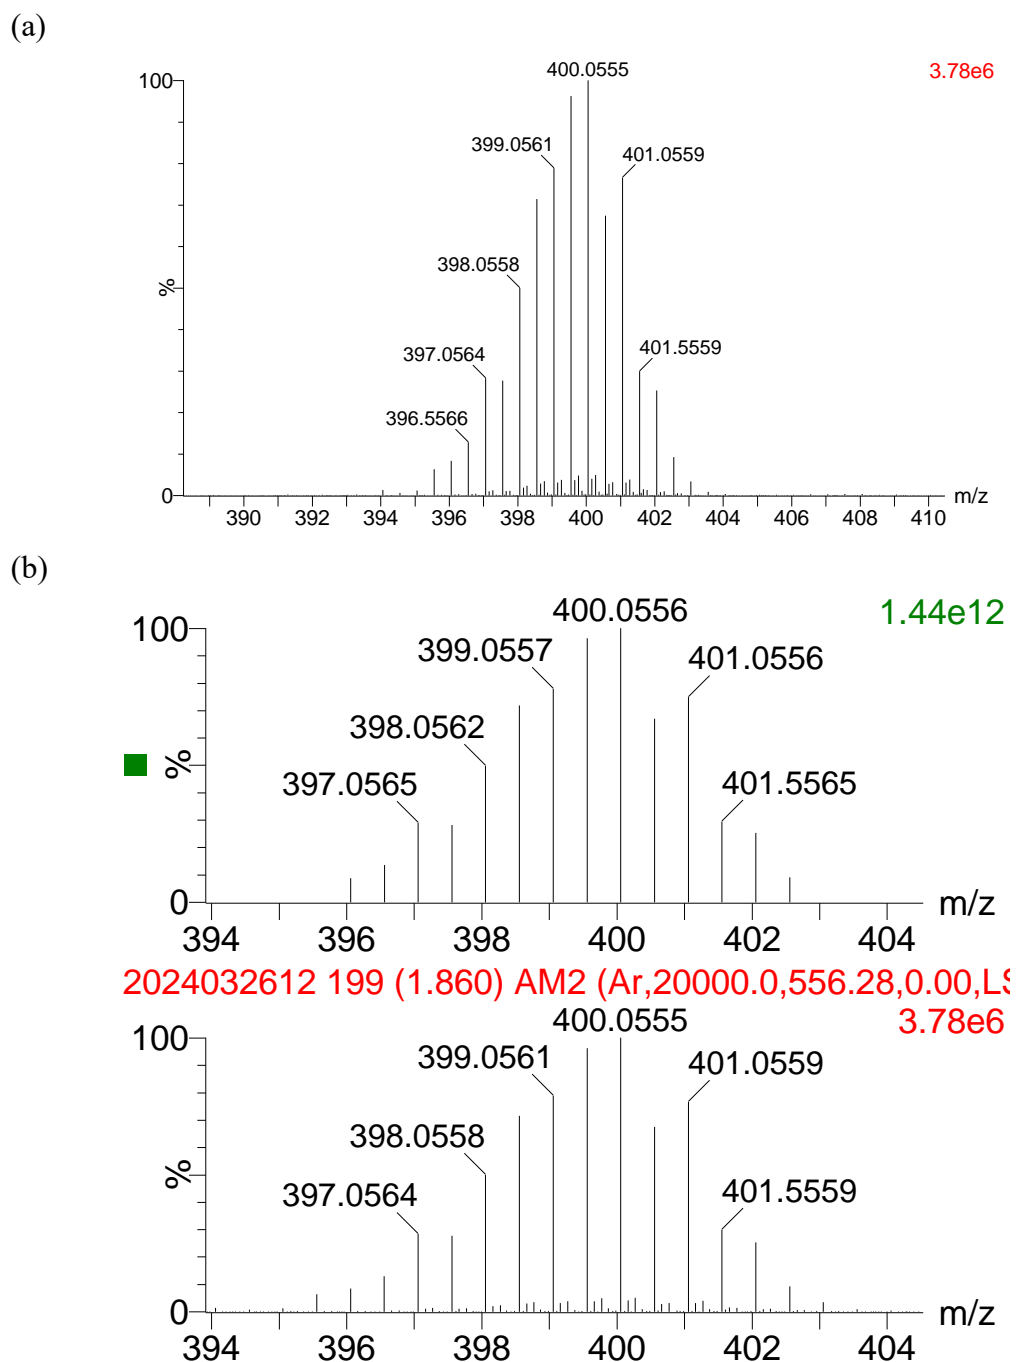

**Figure S17.** ESI-HRMS of **3** in  $\text{CH}_2\text{Cl}_2$ .

(a) The signal at  $m/z$  400.0555 corresponds to  $[\mathbf{3}-2(\text{PF}_6)]^{2+}$ .

(b) Calculated isotopic distribution for  $[\mathbf{3}-2(\text{PF}_6)]^{2+}$  (upper) and the amplifying experimental diagram for  $[\mathbf{3}-2(\text{PF}_6)]^{2+}$  (bottom).

(a)

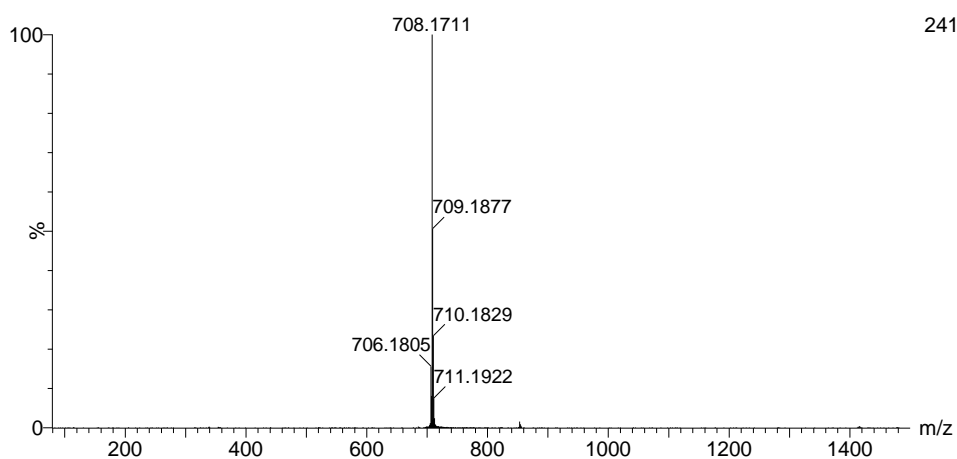

(b)

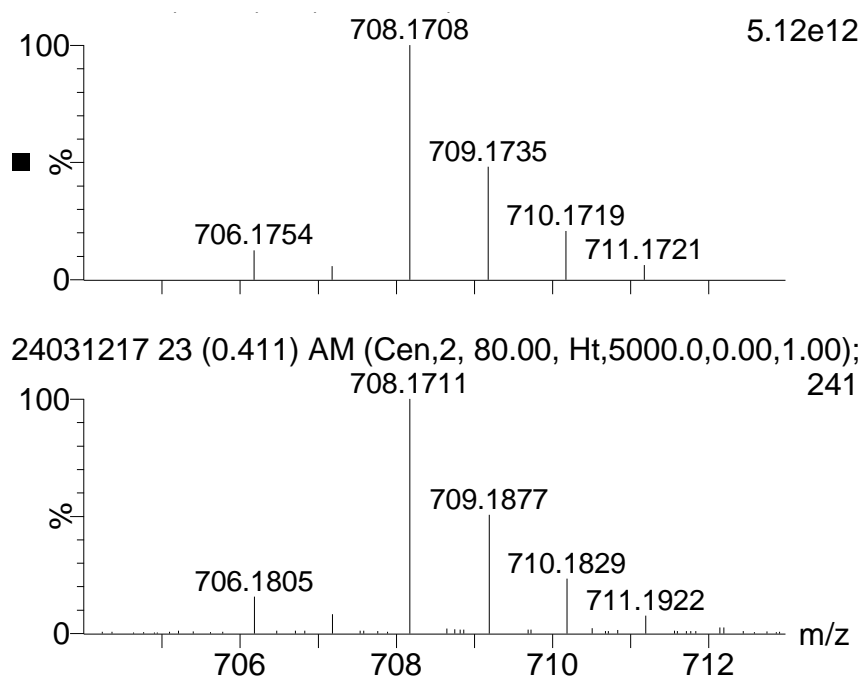

**Figure S18.** ESI-HRMS of **4** in  $\text{CH}_2\text{Cl}_2$ .

(a) The signal at  $m/z$  708.1711 corresponds to  $[\mathbf{4}\text{-PF}_6]^+$ .

(b) Calculated isotopic distribution for  $[\mathbf{4}\text{-PF}_6]^+$  (upper) and the amplifying experimental diagram for  $[\mathbf{4}\text{-PF}_6]^+$  (bottom).



## VII. Cyclic Voltammograms

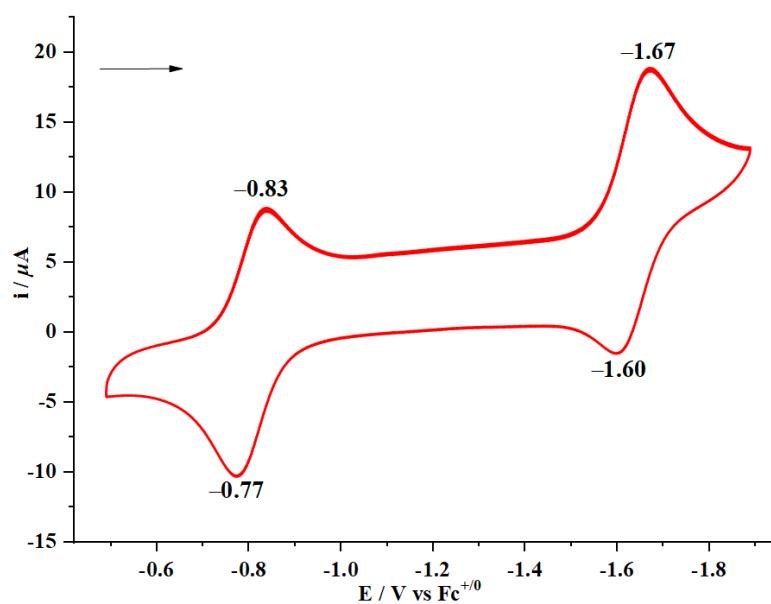

**Figure S19.** The cyclic voltammogram of **1** (1 mM) in MeCN recorded at a scan rate of  $100 \text{ mV s}^{-1}$  with  $0.1 \text{ M } n\text{Bu}_4\text{NPF}_6$  as supporting electrolyte under a nitrogen atmosphere at room temperature. All potentials are referenced versus  $\text{Fc}^{+/0}$  redox couple.

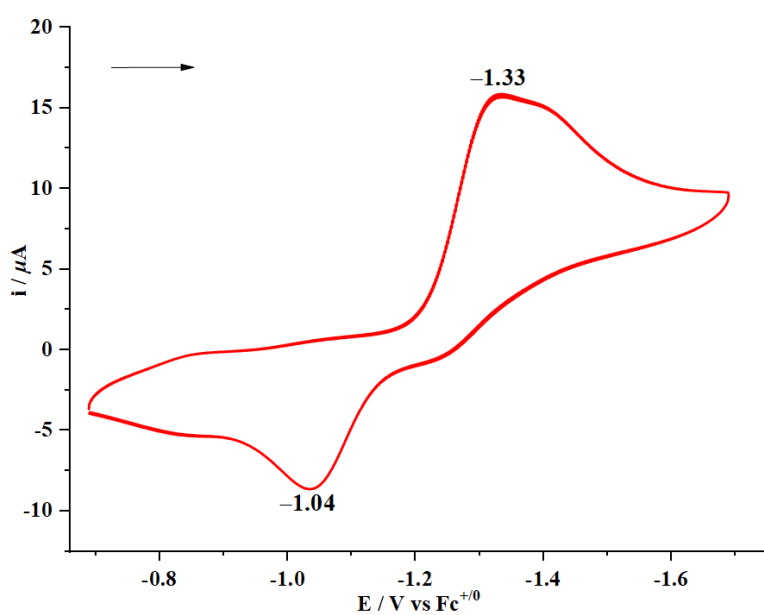

**Figure S20.** The cyclic voltammogram of **2** (1 mM) in MeCN recorded at a scan rate of  $100 \text{ mV s}^{-1}$  with  $0.1 \text{ M } n\text{Bu}_4\text{NPF}_6$  as supporting electrolyte under a nitrogen atmosphere at room temperature. All potentials are referenced versus  $\text{Fc}^{+/0}$  redox couple.

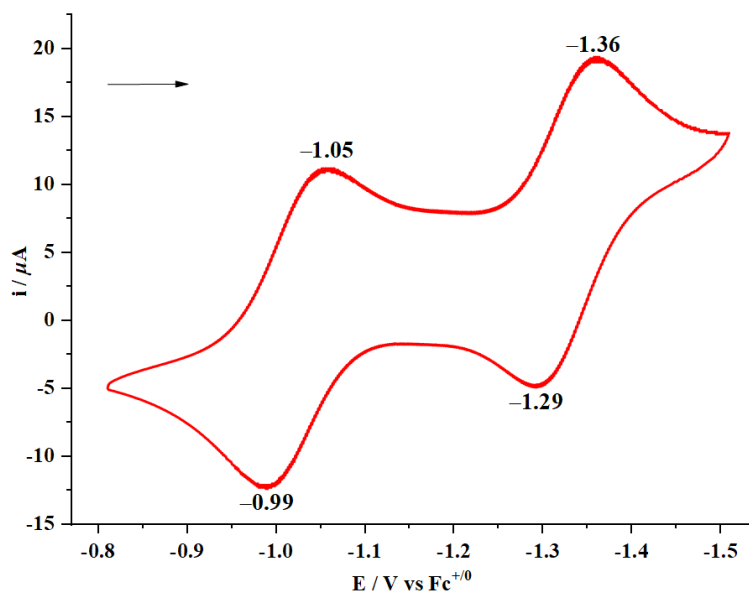

**Figure S21.** The cyclic voltammogram of **3** (1 mM) in MeCN recorded at a scan rate of  $100 \text{ mV s}^{-1}$  with  $0.1 \text{ M } n\text{Bu}_4\text{NPF}_6$  as supporting electrolyte under a nitrogen atmosphere at room temperature. All potentials are referenced versus  $\text{Fc}^{+/0}$  redox couple.

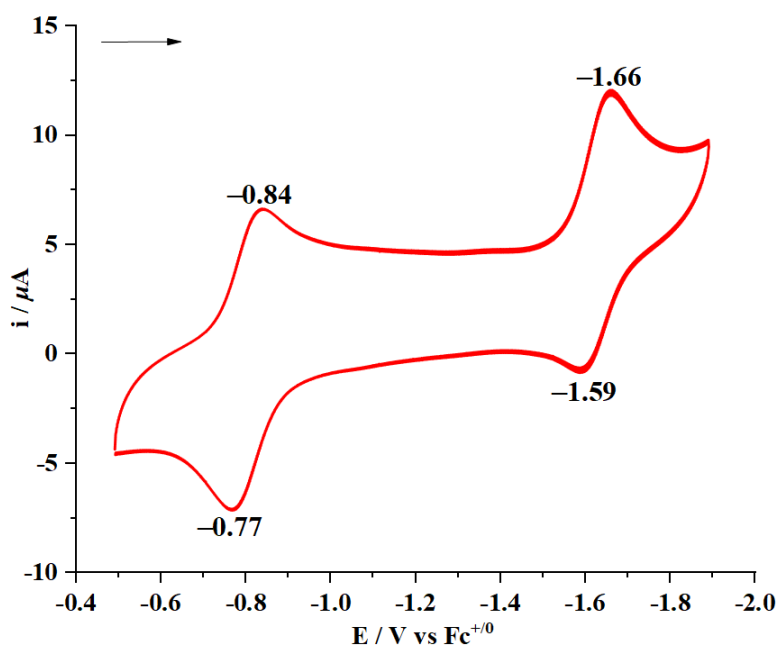

**Figure S22.** The cyclic voltammogram of **4** (1 mM) in MeCN recorded at a scan rate of  $100 \text{ mV s}^{-1}$  with  $0.1 \text{ M } n\text{Bu}_4\text{NPF}_6$  as supporting electrolyte under a nitrogen atmosphere at room temperature. All potentials are referenced versus  $\text{Fc}^{+/0}$  redox couple.

### VIII. *In situ* $^1\text{H}$ NMR Spectra

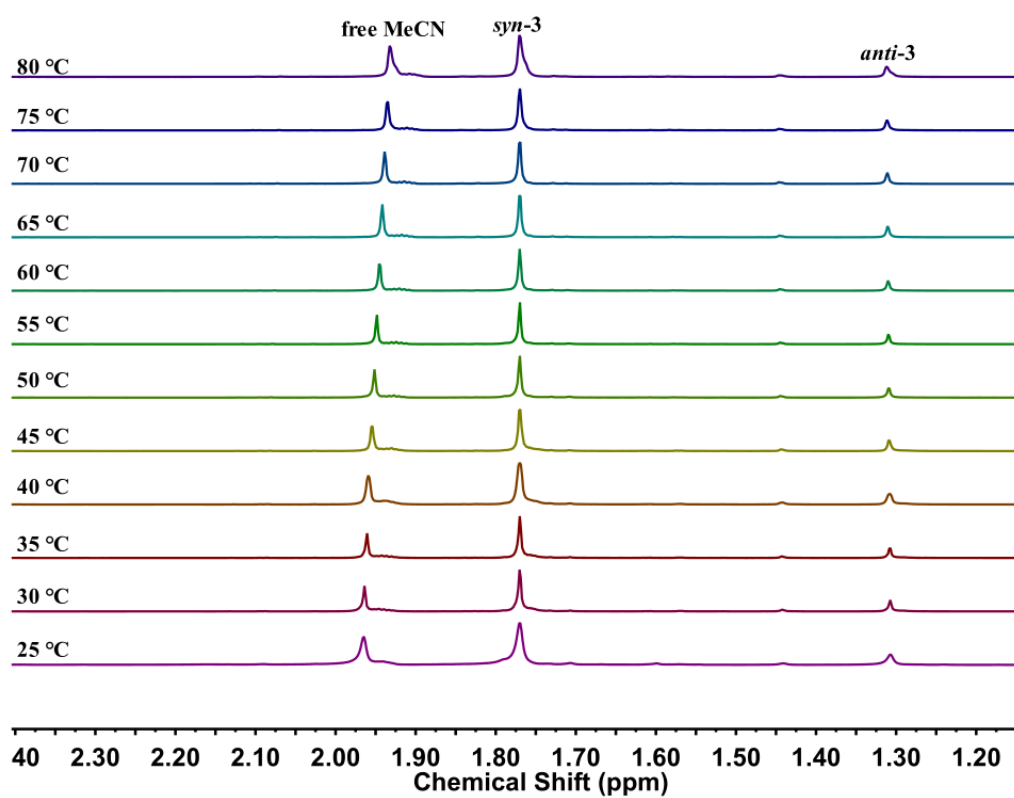

**Figure S23.**  $^1\text{H}$  NMR spectra for the mixture of complexes *syn-3* and *anti-3* in  $\text{CD}_3\text{CN}$  at different temperatures.

## IX. UV/vis Spectra

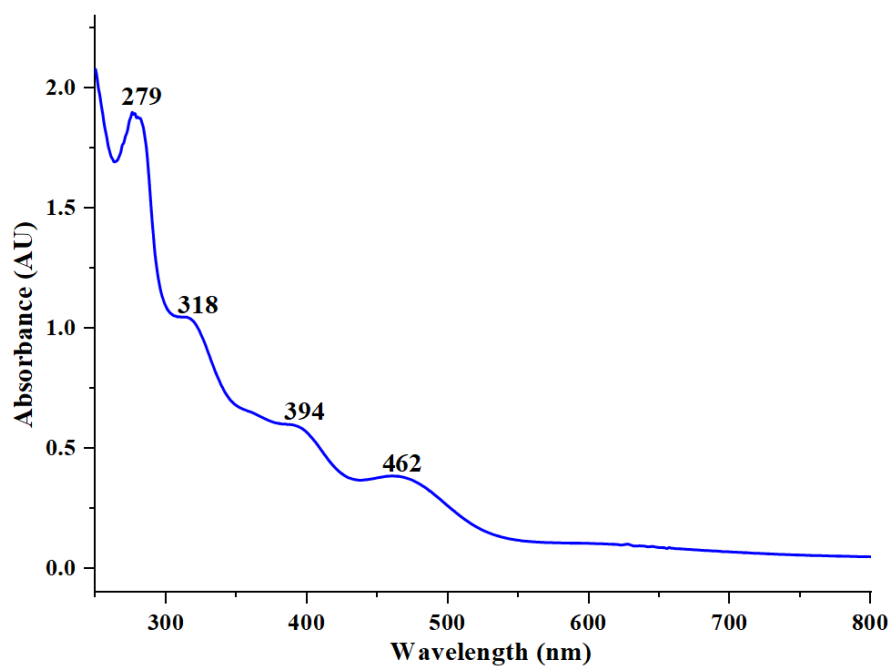

**Figure S24.** UV/vis spectrum of **1** in MeCN (0.1 mM) at 298 K.

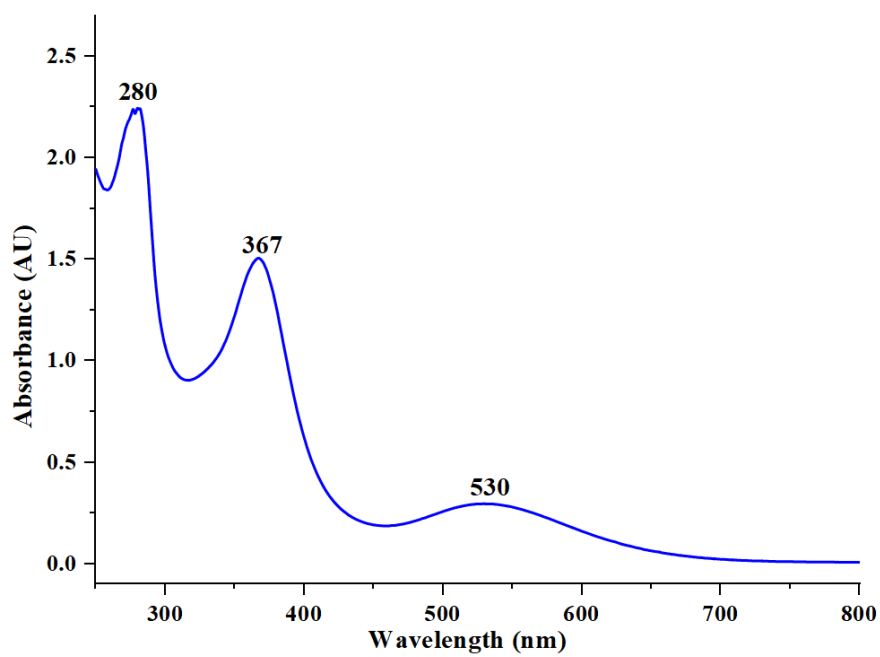

**Figure S25.** UV/vis spectrum of **2** in MeCN (0.1 mM) at 298 K.

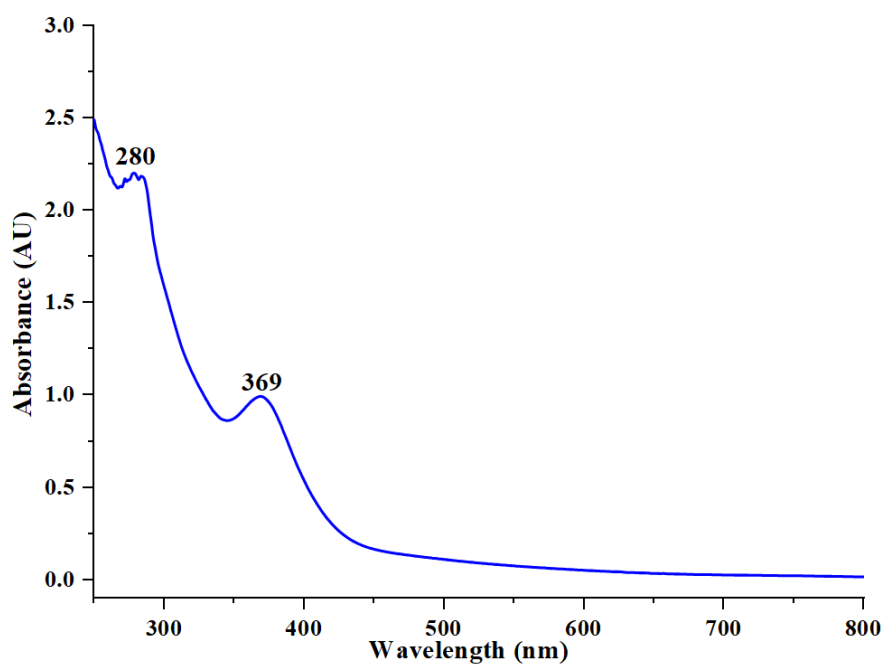

**Figure S26.** UV/vis spectrum of *syn-3* in MeCN (0.1 mM) at 298 K.

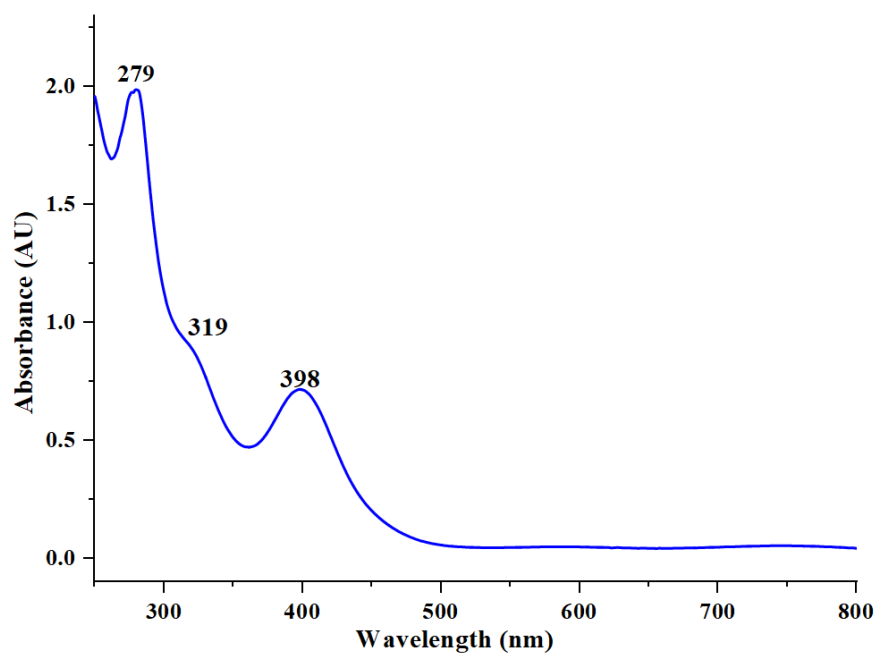

**Figure S27.** UV/vis spectrum of *anti-3* in MeCN (0.1 mM) at 298 K.

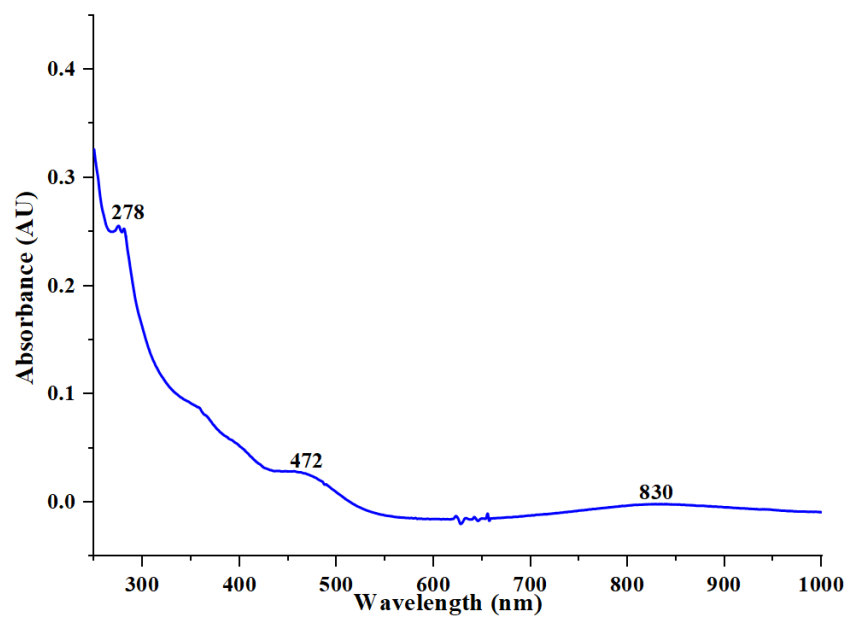

**Figure S28.** UV/vis spectrum of **4** in MeCN (0.1 mM) at 298 K.

## X. Computational Details

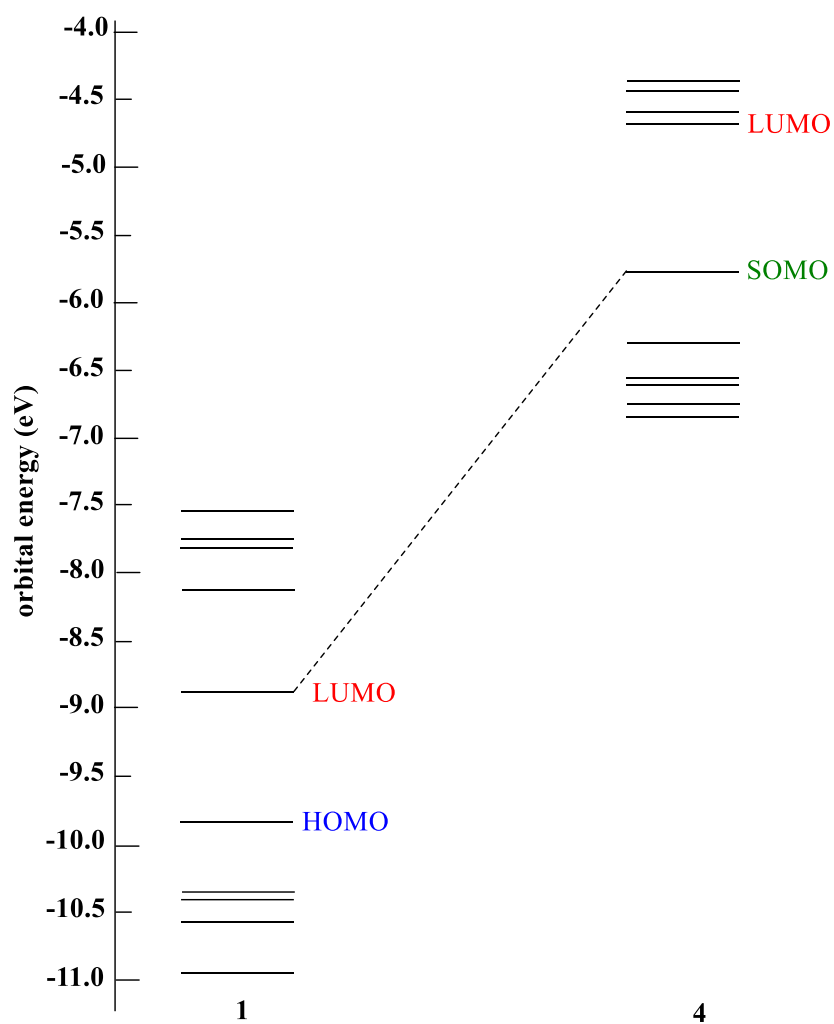

**Figure S29.** Orbital diagram and relevant molecular orbitals of **1** and **4** calculated at the PBE/TZVP level of theory on the geometries optimized using the PBE/TZVP scheme.

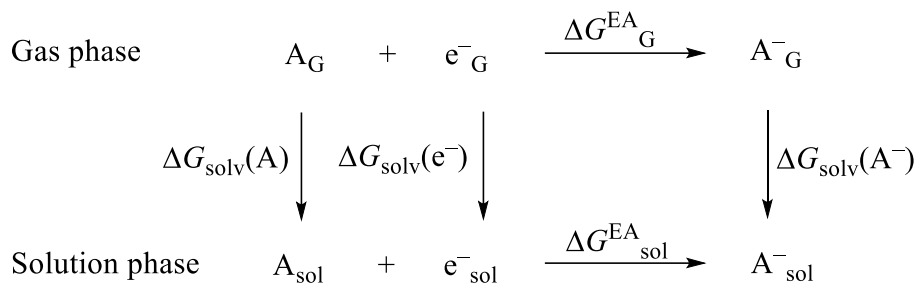

**Scheme 1.** Thermodynamic cycle used for the calculations of reduction potentials.

The redox potential of a given electron coupling reaction in solution was calculated by using the Gibbs free energy change ( $\Delta G_{\text{sol}}^{\text{EA}}$ ).

$$E^\circ = -\Delta G_{\text{sol}}^{\text{EA}}/F \quad (1)$$

Where  $F$  represents the Faraday constant and  $\Delta G_{\text{sol}}^{\text{EA}}$  was computed with the thermodynamic cycle in **Scheme 1**.

$$\Delta G_{\text{sol}}^{\text{EA}} = \Delta G_G^{\text{EA}} + \Delta G_{\text{solv}}(A^-) - \Delta G_{\text{solv}}(AH) - \Delta G_{\text{solv}}(e^-) \quad (2)$$

Since the accurate solvation energy of a single electron is difficult to determine experimentally, the relative redox potential was calculated with respect to the NHE in acetonitrile for which a shift of  $-4.48$  V was used as suggested by Cramer and Truhlar.<sup>22,23</sup>

$$E^\circ(\text{NHE}) = -(\Delta G_G^{\text{EA}} + \Delta G_{\text{solv}}(A^-) - \Delta G_{\text{solv}}(AH))/F - 4.48 \quad (3)$$



## XI. References

1. H. P. Berends and D. W. Stephan, *Inorg. Chim. Acta*, 1984, **93**, 173–178.
2. D. Catheline and D. Astruc, *Organometallics*, 1984, **3**, 1094–1100.
3. S. A. Frith and J. L. Spencer, *Inorg. Synth.*, 1985, **23**, 15–17.
4. P. J. Fagan, M. D. Ward and J. C. Calabrese, *J. Am. Chem. Soc.*, 1989, **111**, 1698–1719.
5. I. S. Weitz and M. Rabinovitz, *J. Chem. Soc. Perkin Trans.*, 1993, **1**, 117–120.
6. B. W. Carlson, L. L. Miller, P. Neta and J. Grodkowski, *J. Am. Chem. Soc.*, 1984, **106**, 7233–7239.
7. D. F. Evans, *J. Chem. Soc.*, 1959, 2003–2005.
8. E. M. Schubert, *J. Chem. Educ.*, 1992, **69**, 62.
9. C. Piguët, *J. Chem. Educ.*, 1997, **74**, 815–816.
10. G. A. Bain and J. F. Berry, *J. Chem. Educ.*, 2008, **85**, 532–536.
11. G. M. Sheldrick, Institute for Inorganic Chemistry, University of Göttingen, Germany, 1996.
12. G. M. Sheldrick, SHELXL-2014, Program for refinement of crystal structures, University of Göttingen, Germany, 2014.
13. G. M. Sheldrick, SHELXS-2014, Program for solution of crystal structures, University of Göttingen, Germany, 2014.
14. L. Palatinus and G. Chapuis, *J. Appl. Crystallogr.*, 2007, **40**, 786–790.
15. O. V. Dolomanov, L. J. Bourhis, R. J. Gildea, J. A. K. Howard and H. Puschmann, *J. Appl. Crystallogr.*, 2009, **42**, 339–341.
16. G. M. Sheldrick, *Acta Crystallogr., Sect. A: Found. Adv.*, 2015, **71**, 3–8.
17. A. D. Becke, *Phys. Rev. A.*, 1988, **38**, 3098–3100.
18. J. P. Perdew, K. Burke and M. Ernzerhof, *Phys. Rev. Lett.*, 1996, **77**, 3865–3868.
19. A. Schäfer, C. Huber and R. Ahlrichs, *J. Chem. Phys.*, 1994, **100**, 5829–5835.
20. K. Eichkorn, O. Treutler, H. Öhm, M. Häser and R. Ahlrichs, *Chem. Phys. Lett.*, 1995, **240**, 283–290.
21. S. Grimme, S. Ehrlich and L. Goerigk, *J. Comput. Chem.*, 2011, **32**, 1456–1465.
22. C. P. Kelly, C. J. Cramer and D. G. Truhlar, *J. Phys. Chem. B*, 2007, **111**, 408–422.
23. J. Song, E. L. Klein, F. Neese and S. Ye, *Inorg. Chem.*, 2014, **53**, 7500–7507.
